# Supplementary material for: Development of an Innovative Soft Piezoresistive Biomaterial Based on the Interconnection of Elastomeric PDMS Networks and Electrically-Conductive PEDOT:PSS Sponges
Source: MDPI journal article supplement (doi:10.3390/jfb13030135), 2022-08-29
Supplement: s1 [file s1]

# Development of an innovative soft piezoresistive biomaterial based on the interconnection of elastomeric PDMS networks and electrically-conductive PEDOT:PSS sponges

Maria Antonia Cassa <sup>1,2</sup>, Martina Maselli <sup>3,4</sup>, Alice Zoso <sup>1,2</sup>, Valeria Chiono <sup>1,2,5</sup>, Letizia Fracchia <sup>6</sup>, Chiara Ceresa <sup>6</sup>, Gianluca Ciardelli <sup>1,2,5</sup>, Matteo Cianchetti <sup>3,4</sup> and Irene Carmagnola <sup>1,2,\*</sup>

<sup>1</sup> Politecnico di Torino, Department of Mechanical and Aerospace Engineering, Corso Duca degli Abruzzi 24, 10129 Torino, Italy

<sup>2</sup> Politecnico di Torino, Polito BIOMed Lab, Corso Castelfidardo 30/a, 10129 Torino, Italy

<sup>3</sup> Scuola Superiore Sant'Anna, The BioRobotics Institute, Viale Rinaldo Piaggio 34, Pontedera, 56025 Pisa, Italy

<sup>4</sup> Scuola Superiore Sant'Anna, Department of Excellence in Robotics & AI, Piazza Martiri della Libertà 33, 56127 Pisa, Italy

<sup>5</sup> National Research Council, Institute for Chemical and Physical Processes (CNR-IPCF), 56124 Pisa, Italy

<sup>6</sup> Department of Pharmaceutical Sciences, Università del Piemonte Orientale "A. Avogadro", Largo Donegani 2, 28100 Novara, Italy

\* Correspondence: irene.carmagnola@polito.it

N° of PAGES 3

N° of FIGURES 5

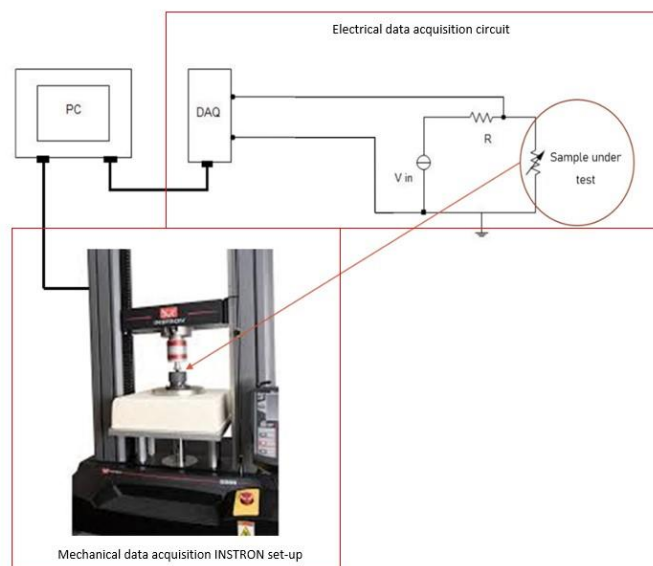

**Figure S1.** Experimental set-up employed to perform the electromechanical characterizations on all samples tested.

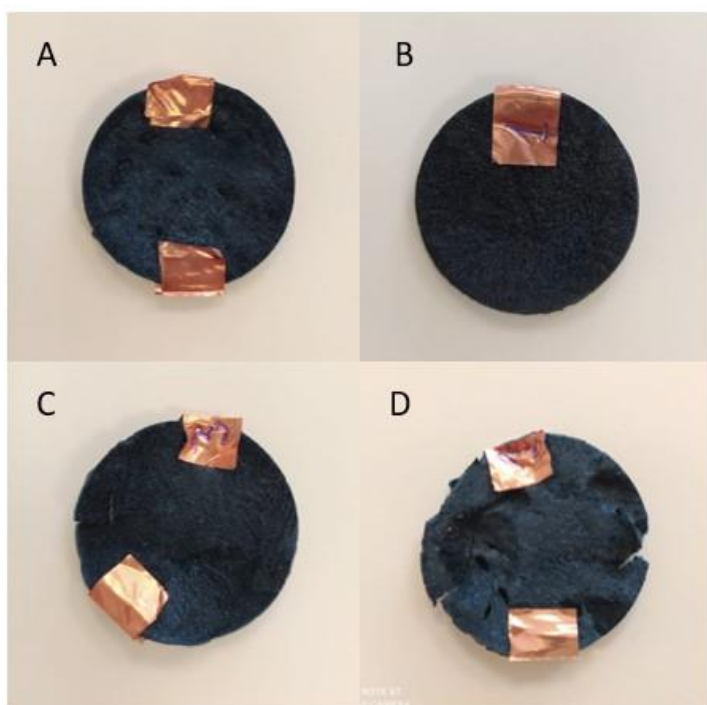

**Figure S2.** Samples after 4 cycles of compressive mechanical test, showing an increasing loss of integrity and original shape for higher concentrations of GPTMS (A) PEDOT\_GPTMS 1% (B) PEDOT\_GPTMS 1% / PDMS (C) PEDOT\_GPTMS 2% (D) PEDOT\_GPTMS 3%.

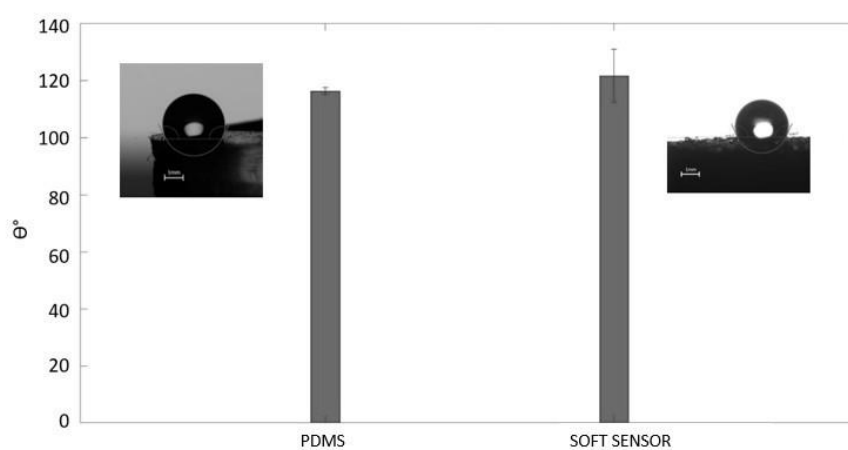

**Figure S3.** WCA value and drop images for native PDMS (left) and PEDOT\_GPTMS 1% / PDMS (right).

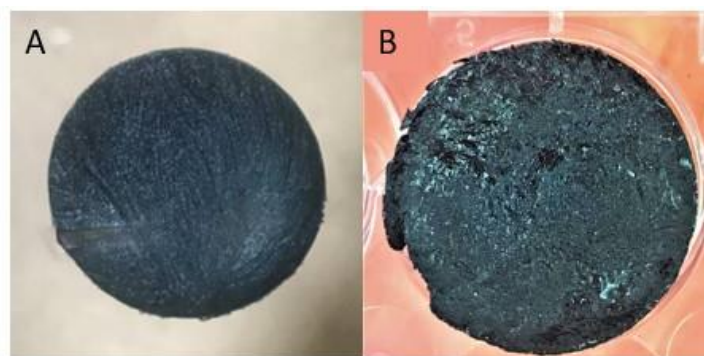

**Figure S4.** Frontal photo of (A) PEDOT\_GPTMS 1% (B) PEDOT\_GPTMS 1% / PDMS showing that no insulating PDMS film forms on the surface.

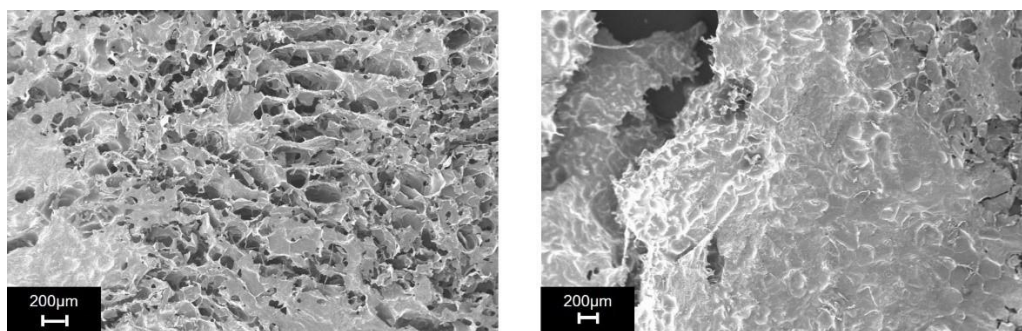

**Figure S5.** SEM images of PEDOT\_GPTMS 1% / PDMS obtained through (left) 5 min immersions in two separate wells (right) 48h leave-in method.
